# Supplementary material
Source: PubMed Central journal article supplement (PMC4386684)
Supplement: NIHMS652518-supplement-2.pdf [file NIHMS652518-supplement-2.pdf]

# Genomewide Association Study of Nicotine Dependence in American Populations: Identification of Novel Risk Loci in Both African- and European-Americans

## Supplement 1

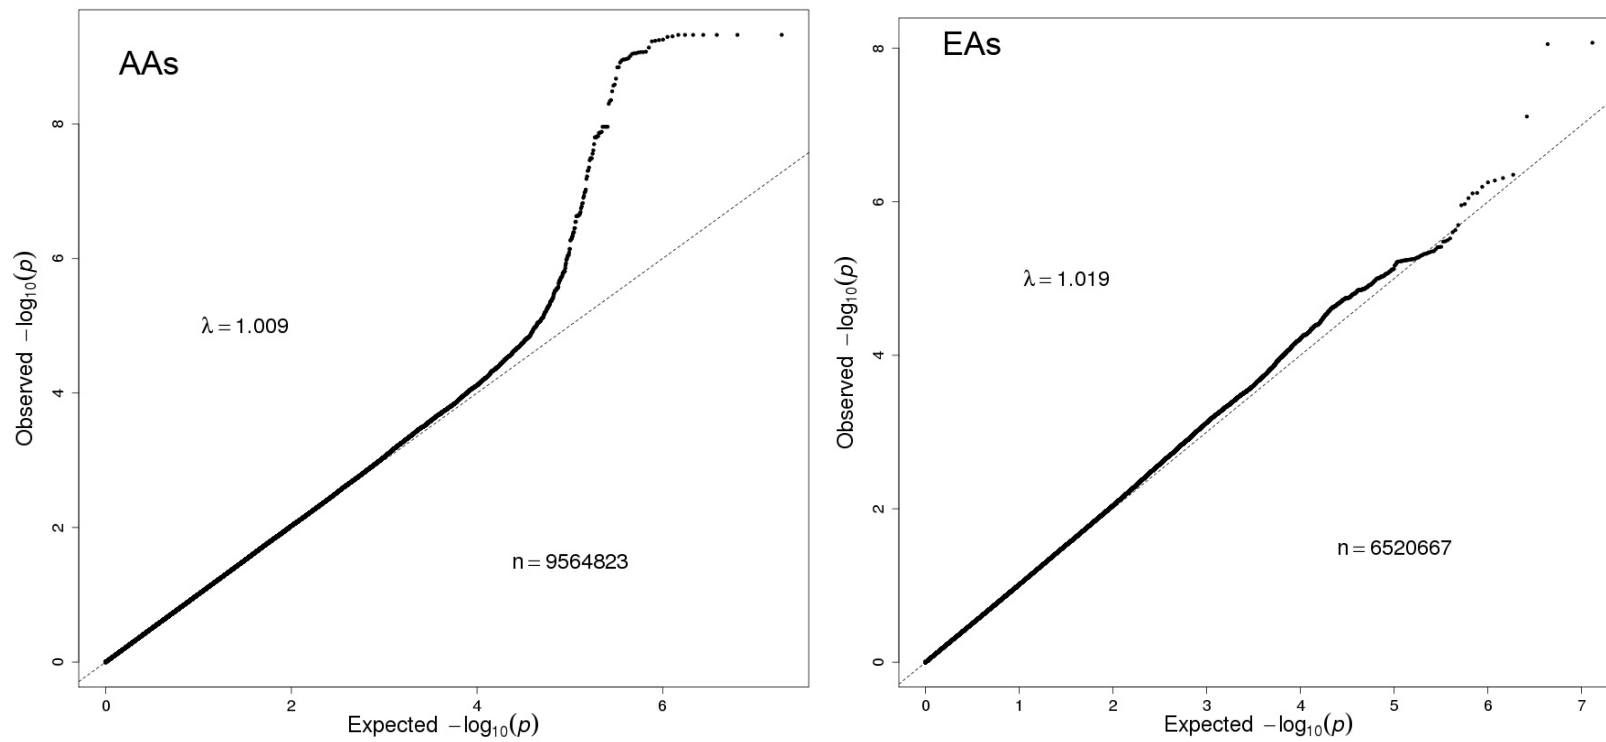

Figure S1. QQ plots. AAs, African Americans; EAs, European Americans.

**Table S1. Sample characteristics.**

| Sample    | African Americans |          |          |                      | European Americans |          |          |                      |
|-----------|-------------------|----------|----------|----------------------|--------------------|----------|----------|----------------------|
|           | #                 | Male (%) | Mean Age | Mean FTND Score (SD) | #                  | Male (%) | Mean Age | Mean FTND Score (SD) |
| Yale-Penn | 2602              | 54.6     | 42.1     | 4.29 (2.23)          | 2114               | 58.9     | 37.7     | 5.43 (2.22)          |
| SAGE      | 927               | 51.2     | 39.9     | 3.98 (2.82)          | 2003               | 44.2     | 37.9     | 3.10 (3.27)          |

FTND, Fagerström Test for Nicotine Dependence.

**Table S2. Chromosome 15 *CHRN* SNPs showing  $p$ -values  $<10^{-4}$ .**

| Chr | Marker      | Gene          | Meta AA<br><i>p</i> | Meta EA<br><i>p</i> | Meta All<br><i>p</i> | Yale-Penn AA<br><i>p</i> | Yale-Penn EA<br><i>p</i> | SAGE AA<br><i>p</i> | SAGE EA<br><i>p</i> |
|-----|-------------|---------------|---------------------|---------------------|----------------------|--------------------------|--------------------------|---------------------|---------------------|
| 15  | rs58365910  | NA            | 7.08E-03            | 3.17E-04            | 7.58E-06             | 4.27E-03                 | 1.17E-02                 | 8.46E-01            | 6.15E-03            |
| 15  | rs72740955  | NA            | 1.24E-02            | 2.78E-04            | 1.02E-05             | 2.13E-02                 | 9.39E-03                 | 3.36E-01            | 7.54E-03            |
| 15  | rs2036527   | NA            | 8.76E-04            | 2.83E-04            | 8.48E-07             | 2.49E-03                 | 9.23E-03                 | 1.61E-01            | 7.72E-03            |
| 15  | rs55853698  | <i>CHRNA5</i> | 1.70E-02            | 2.87E-04            | 1.45E-05             | 1.37E-01                 | 1.11E-02                 | 6.52E-03            | 6.46E-03            |
| 15  | rs55781567  | <i>CHRNA5</i> | 9.65E-03            | 6.69E-04            | 2.08E-05             | 5.90E-02                 | 1.83E-02                 | 3.87E-02            | 8.89E-03            |
| 15  | rs190065944 | <i>CHRNA5</i> | 8.40E-03            | 1.89E-03            | 4.83E-05             | 1.46E-02                 | 5.29E-02                 | 3.22E-01            | 6.57E-03            |
| 15  | rs11633958  | <i>CHRNA5</i> | 4.21E-04            | 1.94E-04            | 6.78E-07             | 5.96E-03                 | 9.58E-03                 | 7.50E-03            | 4.43E-03            |
| 15  | rs7172118   | <i>CHRNA5</i> | 1.63E-02            | 3.41E-04            | 1.61E-05             | 1.83E-02                 | 1.28E-02                 | 5.54E-01            | 6.44E-03            |
| 15  | rs17486195  | <i>CHRNA5</i> | 4.68E-02            | 3.67E-04            | 4.95E-05             | 6.82E-02                 | 1.37E-02                 | 4.32E-01            | 6.39E-03            |
| 15  | rs140330585 | <i>CHRNA5</i> | 2.51E-02            | 3.73E-04            | 2.68E-05             | 4.15E-02                 | 1.42E-02                 | 3.47E-01            | 5.93E-03            |
| 15  | rs17486278  | <i>CHRNA5</i> | 1.64E-03            | 4.11E-04            | 2.28E-06             | 4.32E-03                 | 1.47E-02                 | 1.86E-01            | 6.71E-03            |
| 15  | rs72740964  | <i>CHRNA5</i> | 7.98E-04            | 2.23E-04            | 1.10E-06             | 6.07E-03                 | 1.11E-02                 | 2.83E-02            | 4.74E-03            |
| 15  | rs7180002   | <i>CHRNA5</i> | 2.15E-02            | 4.74E-04            | 2.87E-05             | 2.31E-02                 | 1.49E-02                 | 5.92E-01            | 7.94E-03            |
| 15  | rs200776369 | NA            | 9.57E-04            | 4.76E-04            | 2.27E-06             | 4.15E-03                 | 2.22E-02                 | 8.38E-02            | 3.88E-03            |
| 15  | rs56390833  | <i>CHRNA5</i> | 2.43E-02            | 4.34E-04            | 2.95E-05             | 2.65E-02                 | 1.47E-02                 | 5.94E-01            | 6.51E-03            |
| 15  | rs951266    | <i>CHRNA5</i> | 2.37E-02            | 4.53E-04            | 3.01E-05             | 2.57E-02                 | 1.46E-02                 | 5.96E-01            | 7.83E-03            |
| 15  | rs16969968  | <i>CHRNA5</i> | 2.47E-04            | 2.57E-04            | 7.38E-07             | 4.49E-03                 | 1.00E-02                 | 5.18E-03            | 6.60E-03            |
| 15  | rs8192482   | <i>CHRNA5</i> | 2.77E-04            | 2.37E-04            | 7.22E-07             | 5.00E-03                 | 9.76E-03                 | 5.44E-03            | 5.90E-03            |
| 15  | rs4887067   | <i>CHRNA5</i> | 2.77E-04            | 2.26E-04            | 6.84E-07             | 4.97E-03                 | 9.74E-03                 | 5.45E-03            | 5.92E-03            |
| 15  | rs1051730   | <i>CHRNA3</i> | 1.03E-02            | 4.00E-04            | 1.25E-05             | 5.38E-03                 | 1.43E-02                 | 9.36E-01            | 6.66E-03            |
| 15  | rs1317286   | <i>CHRNA3</i> | 8.94E-03            | 2.31E-04            | 7.13E-06             | 1.49E-02                 | 7.80E-03                 | 3.42E-01            | 7.64E-03            |
| 15  | rs55676755  | <i>CHRNA3</i> | 1.09E-02            | 3.68E-04            | 1.22E-05             | 2.06E-02                 | 1.21E-02                 | 2.95E-01            | 7.81E-03            |

| Chr | Marker                   | Gene          | Meta AA<br><i>p</i> | Meta EA<br><i>p</i> | Meta All<br><i>p</i> | Yale-Penn AA<br><i>p</i> | Yale-Penn EA<br><i>p</i> | SAGE AA<br><i>p</i> | SAGE EA<br><i>p</i> |
|-----|--------------------------|---------------|---------------------|---------------------|----------------------|--------------------------|--------------------------|---------------------|---------------------|
| 15  | rs56077333               | <i>CHRNA3</i> | 5.89E-02            | 2.90E-04            | 6.12E-05             | 7.03E-02                 | 1.00E-02                 | 5.65E-01            | 7.11E-03            |
| 15  | rs141518190              | <i>CHRNA3</i> | 1.66E-02            | 3.25E-04            | 1.61E-05             | 6.56E-02                 | 1.06E-02                 | 7.88E-02            | 7.29E-03            |
| 15  | rs147499554              | <i>CHRNA3</i> | 1.66E-02            | 3.25E-04            | 1.61E-05             | 6.56E-02                 | 1.06E-02                 | 7.89E-02            | 7.29E-03            |
| 15  | rs138544659              | <i>CHRNA3</i> | 1.08E-02            | 6.24E-04            | 1.99E-05             | 4.92E-02                 | 1.58E-02                 | 6.41E-02            | 9.96E-03            |
| 15  | rs147144681              | <i>CHRNA3</i> | 5.49E-02            | 5.25E-04            | 8.74E-05             | 7.10E-02                 | 1.25E-02                 | 4.99E-01            | 1.14E-02            |
| 15  | rs114205691              | <i>CHRNA3</i> | 5.67E-02            | 3.19E-04            | 6.35E-05             | 1.08E-01                 | 1.02E-02                 | 2.79E-01            | 8.26E-03            |
| 15  | rs146009840              | <i>CHRNA3</i> | 1.36E-03            | 3.58E-04            | 2.73E-06             | 8.78E-03                 | 1.46E-02                 | 4.20E-02            | 5.08E-03            |
| 15  | rs8040868                | <i>CHRNA3</i> | 9.58E-03            | 1.08E-03            | 3.35E-05             | 3.12E-02                 | 8.75E-03                 | 1.31E-01            | 4.90E-02            |
| 15  | rs4243084                | <i>CHRNA3</i> | 4.61E-03            | 7.95E-04            | 1.13E-05             | 5.27E-03                 | 2.44E-02                 | 4.65E-01            | 7.45E-03            |
| 15  | rs149959208 <sup>a</sup> | <i>CHRNA3</i> | 1.28E-02            | 8.79E-04            | 3.37E-05             | 2.91E-02                 | 2.70E-02                 | 2.09E-01            | 7.02E-03            |
| 15  | rs71448806 <sup>b</sup>  | <i>CHRNA3</i> | 2.19E-03            | 3.52E-03            | 2.34E-05             | 2.02E-02                 | 3.27E-02                 | 2.47E-02            | 3.88E-02            |
| 15  | rs55958997               | NA            | 4.69E-03            | 2.66E-03            | 3.70E-05             | 2.71E-02                 | 3.17E-02                 | 4.86E-02            | 2.68E-02            |
| 15  | rs2869548                | <i>CHRNA4</i> | 2.81E-02            | 1.43E-04            | 1.14E-05             | 8.81E-02                 | 4.47E-03                 | 1.04E-01            | 8.95E-03            |
| 15  | rs17487223               | <i>CHRNA4</i> | 1.11E-02            | 4.13E-04            | 1.37E-05             | 4.81E-02                 | 1.01E-02                 | 5.89E-02            | 1.17E-02            |
| 15  | rs72743158               | <i>CHRNA4</i> | 1.18E-02            | 3.09E-04            | 1.26E-05             | 4.18E-02                 | 6.09E-03                 | 9.58E-02            | 1.60E-02            |
| 15  | rs67426328               | NA            | 1.58E-01            | 7.96E-05            | 3.69E-05             | 2.48E-01                 | 5.75E-04                 | 3.77E-01            | 5.24E-02            |
| 15  | rs3813567                | NA            | 7.05E-03            | 1.69E-03            | 3.69E-05             | 2.54E-03                 | 3.76E-03                 | 9.05E-01            | 1.91E-01            |
| 15  | rs17487514               | NA            | 1.41E-01            | 9.62E-05            | 3.43E-05             | 3.01E-01                 | 4.09E-05                 | 1.74E-01            | 3.81E-01            |
| 15  | rs6495314                | NA            | 1.36E-02            | 8.01E-04            | 3.38E-05             | 2.54E-02                 | 7.37E-04                 | 2.90E-01            | 3.17E-01            |
| 15  | rs199970818              | NA            | 8.84E-01            | 2.18E-05            | 9.63E-04             | 8.78E-01                 | 3.54E-04                 | 9.88E-01            | 2.18E-02            |

<sup>a</sup> rs149959208 effect allele is TGCGCGGGGCAGGGCGACGGGCA.

<sup>b</sup> rs71448806 reference allele is CGCGGGCGG.

AA, African American; EA, European American.

**Table S3. Detailed results (spreadsheet).** Available in Supplement 2 as an Excel file.
